# Supplementary material for: A Prospective Metagenomic and Metabolomic Analysis of the Impact of Exercise and/or Whey Protein Supplementation on the Gut Microbiome of Sedentary Adults
Source: PubMed Central journal article supplement (PMC5915698; doi:10.1128/msystems.00044-18), 2018-04-24

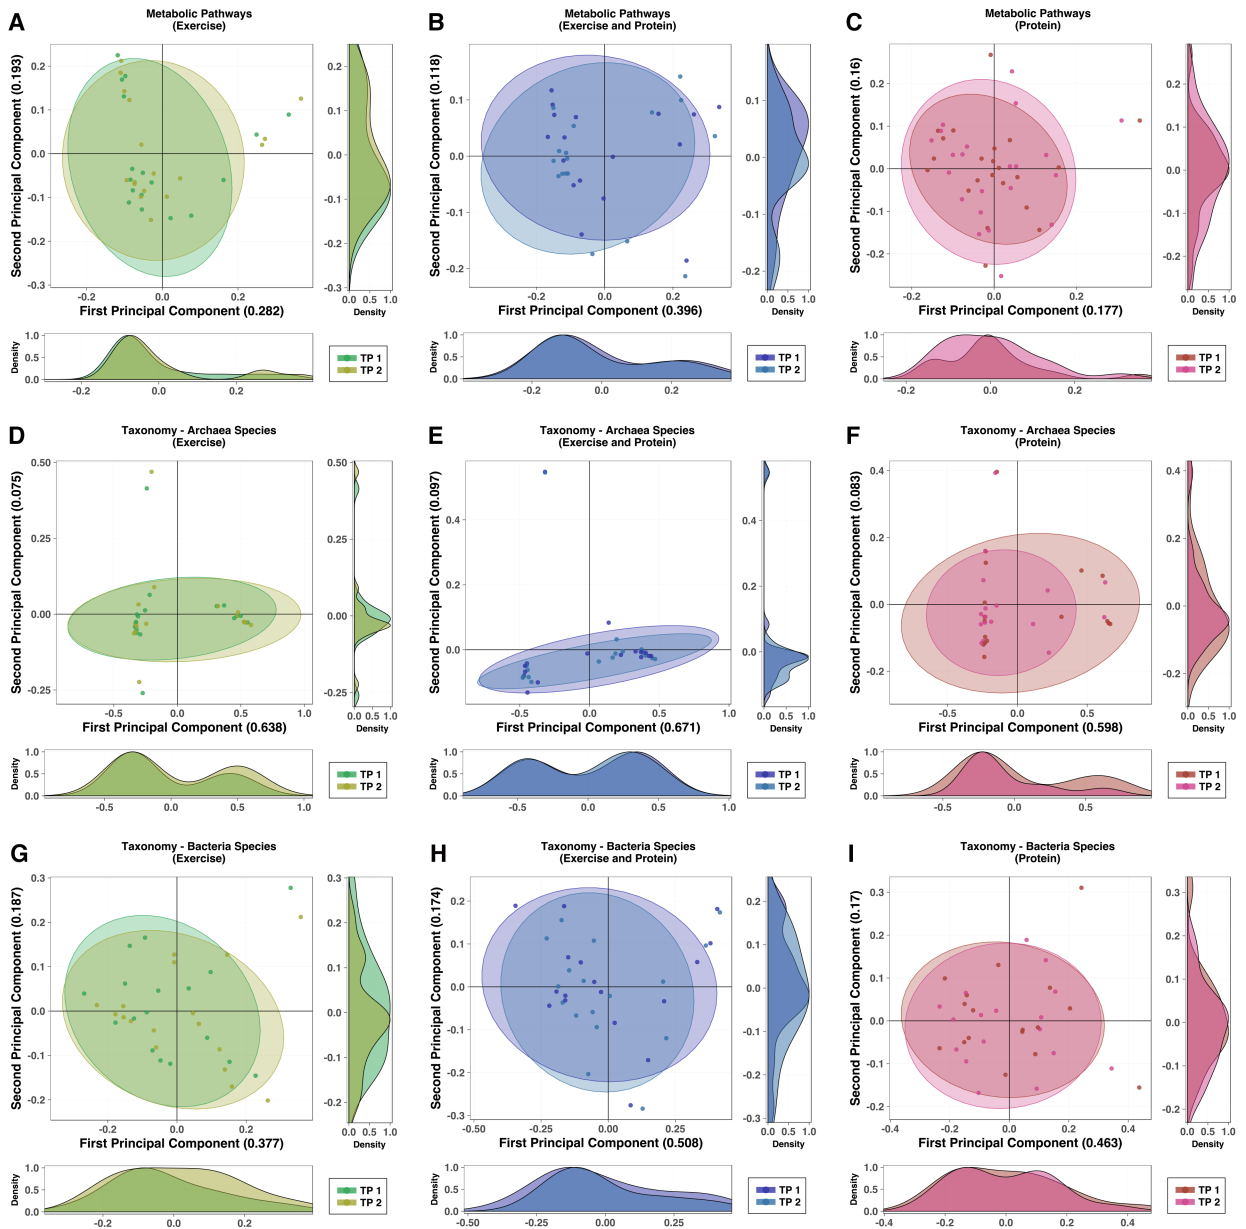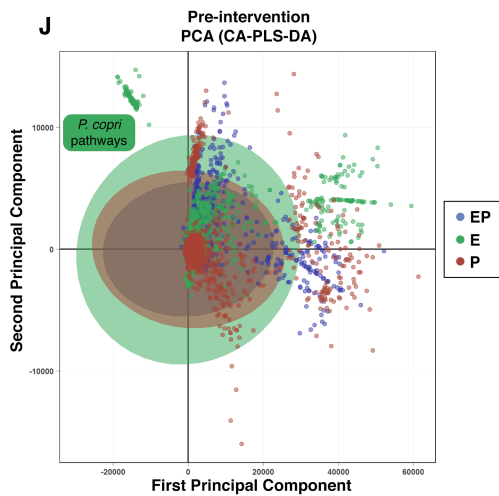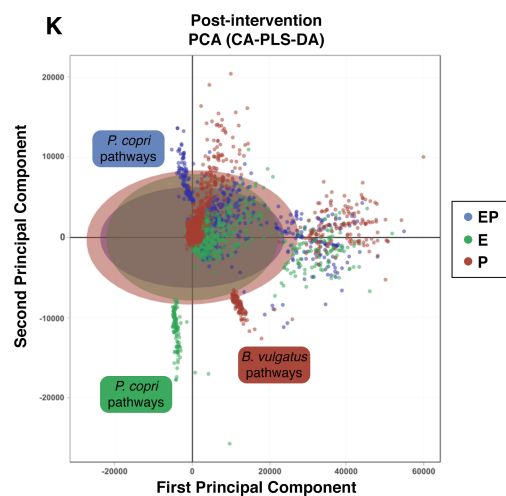

Supplement: sys003182228sf3.pdf [file sys003182228sf3.pdf]
